# Supplementary material for: Non-Leachable Hydrophilic Additives for Amphiphilic Coatings
Source: MDPI journal article supplement (doi:10.3390/polym10040445), 2018-04-16
Supplement: s1 [file s1]

## Supplementary Materials

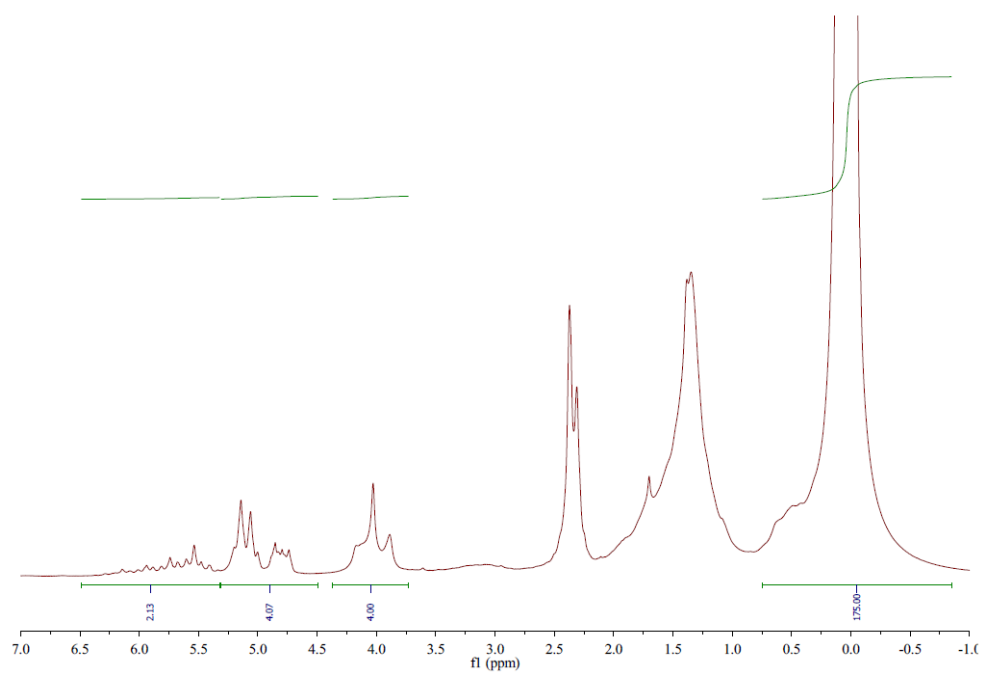

Figure S1 : NMR<sup>1</sup>H of PDMS after Steglich esterification and purification.

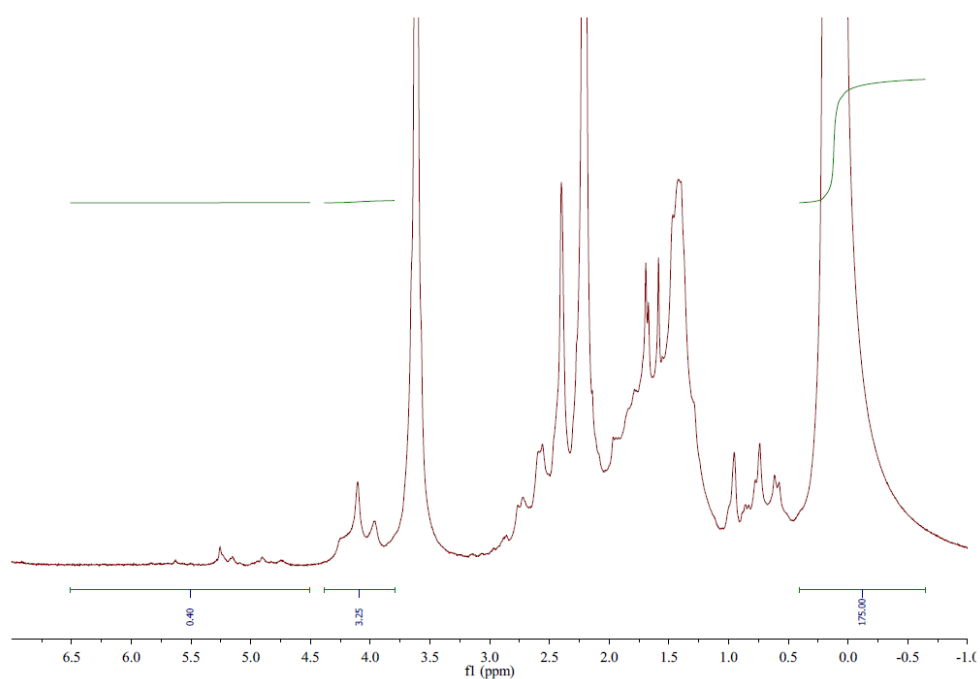

Figure S2 : NMR<sup>1</sup>H of PDMS after thiol-ene reaction and purification.

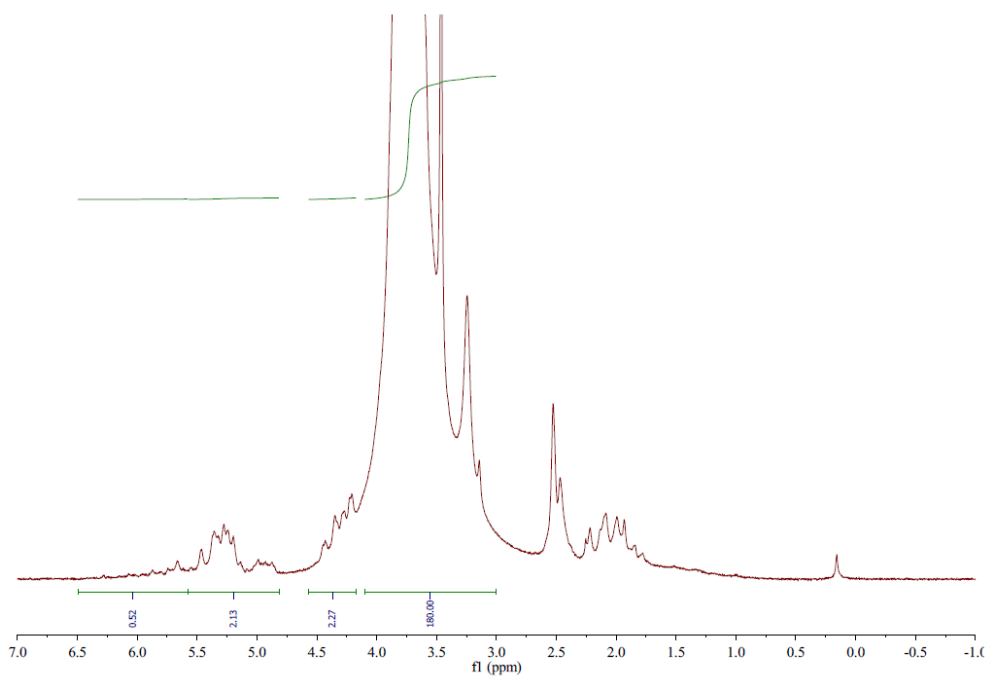

Figure S3 : NMR<sup>1</sup>H of PEG (45-Alk8-TMS) after Steglich reaction and purification.

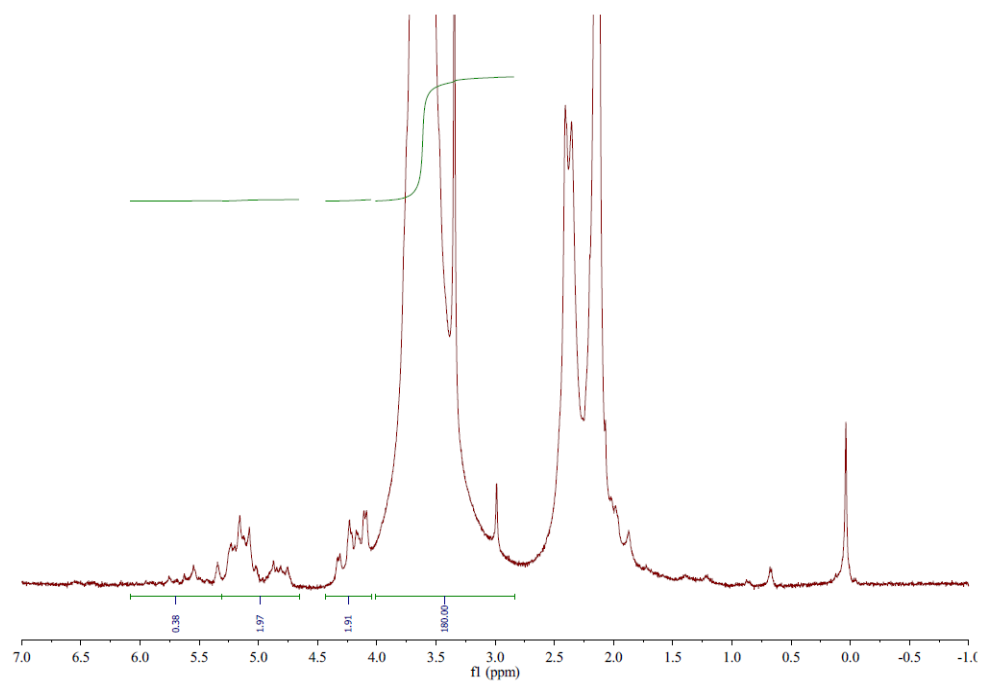

Figure S4 : NMR<sup>1</sup>H of PEG (45-Alk14-TMS) after Steglich reaction and purification.

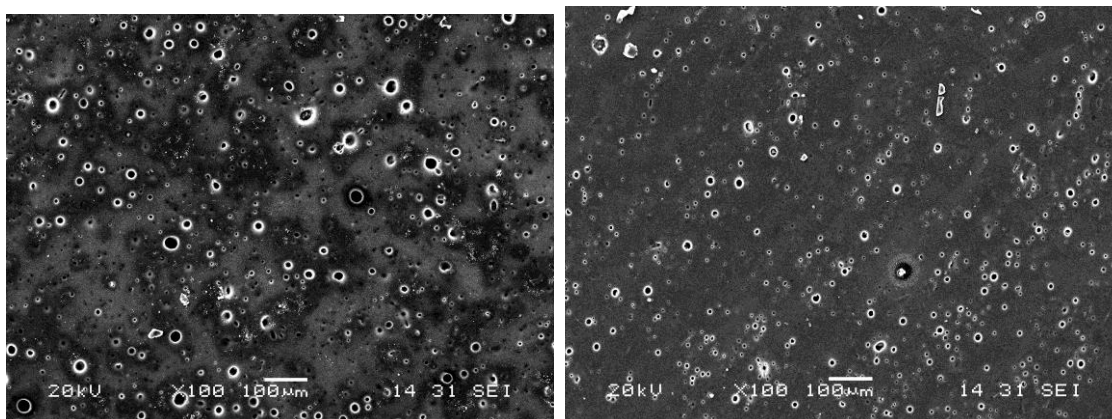

Figure S5 : Scanning Electron Microscopy. Homogeneity of PDMS<sub>28</sub> methoxy ended cross-linked film with hydrophilic compounds incorporated (a) *45-OH* (b) *PDMS-SiOH*.

Table S1: Formulations of different coatings. Each sample is named as the PEG additives used for their formulation. Weight percentage are function of PDMS matrix weight.

| Samples                                                       | Solvent<br>(Ethanol) | Catalyst<br>(H <sub>3</sub> PO <sub>4</sub> ) | PEG additives | Time of cross<br>linking           |
|---------------------------------------------------------------|----------------------|-----------------------------------------------|---------------|------------------------------------|
| Reference<br>6-TMS<br>9-OH                                    |                      |                                               |               |                                    |
| PDMS-SiOH<br>PDMS-TMS<br>45-OH<br>45-Alk8-TMS<br>45-Alk14-TMS | 50wt%                | 1wt%                                          | 10wt%         | 24h at 20°C<br>then<br>48h at 30°C |
